# Supplementary material
Source: PubMed Central journal article supplement (PMC6813595)
Supplement: jamaophthalmol-137-1424-s001.pdf [file jamaophthalmol-137-1424-s001.pdf]

## Supplementary Online Content

Hutton DW, Stein JD, Glassman AR, et al; for the DRCR Retina Network. Five-year cost-effectiveness of intravitreal ranibizumab therapy vs panretinal photocoagulation for treating proliferative diabetic retinopathy: a secondary analysis of a randomized clinical trial. *JAMA Ophthalmol*. Published online October 24, 2019. doi:10.1001/jamaophthalmol.2019.4284

**eTable 1.** Input Parameters

**eTable 2.** Details on Procedure Costing

**eTable 3.** Baseline Characteristics of the Study Population

**eTable 4.** Change in QALYs

**eTable 5.** Cost-effectiveness Results

**eTable 6.** Scenario Analysis: Including Costs of Systemic Adverse Events

**eTable 7.** Incremental Cost-effectiveness Ratio Values as Each Parameter Assumption is Changed From Low to High, One-at-a-Time

**eFigure 1.** Two-Way Sensitivity Analysis on Utility With Good Vision (20/20–20/25) Versus Moderate Vision Loss (20/50–20/200) With and Without Baseline Center-Involved Diabetic Macular Edema and Vision Loss

**eFigure 2.** One-Way Sensitivity Analysis Varying Cost of Anti-Vascular Endothelial Growth Factor With Utilities Converted From Visual Acuity in Treated Eye Assuming Effectiveness of 0.5-mg Ranibizumab

**eFigure 3.** Two-Way Sensitivity Analysis on Number of Annual Injections With and Without Baseline Center-Involved Diabetic Macular Edema and Vision Loss

**eFigure 4.** Two-Way Sensitivity Analysis on Utility With Moderate Vision Loss (20/50–20/200) Versus Cost of Anti-VEGF Drug Injections With and Without Baseline Center-Involved Diabetic Macular Edema and Vision Loss

**eFigure 5.** Two-Way Sensitivity Analysis on Utility With Moderate Vision Loss (20/50–20/200) Versus Effectiveness in Terms of Long-term Improvements in Vision With and Without Baseline Center-Involved Diabetic Macular Edema and Vision Loss

**eFigure 6.** Two-Way Sensitivity Analysis on Cost of Anti-VEGF Drug Versus Effectiveness in Terms of Long-term Improvements in Vision With and Without Baseline Center-Involved Diabetic Macular Edema and Vision Loss

**eFigure 7.** Cost-effectiveness Acceptability Curves With Utilities Converted From Visual Acuity in Treated Eye

**eReferences.**

This supplementary material has been provided by the authors to give readers additional information about their work.

**eTable 1. Input Parameters**

| Parameter                                              | Parameter Value | Range Explored in Sensitivity Analysis | Distribution for Probabilistic Sensitivity Analysis | Source                                  |
|--------------------------------------------------------|-----------------|----------------------------------------|-----------------------------------------------------|-----------------------------------------|
| <b>Unit Costs (per procedure)</b>                      |                 |                                        |                                                     |                                         |
| Aqueous tap                                            | \$123.12        | (111-135)                              | Uniform (111,135)                                   | Medicare <sup>1</sup><br>CPT 65800      |
| Cataract extraction with intraocular lens placement    | \$3,279.37      | (2788-3408)                            | Uniform (2951,3607)                                 | Medicare<br>CPT 66984                   |
| Cataract extraction without intraocular lens placement | \$2,566.63      | (2155-2634)                            | Uniform (2310,2823)                                 | Medicare<br>CPT 66984                   |
| Diode laser (open angle glaucoma)                      | \$2,214.91      | (1620-1980)                            | Uniform (1993,2436)                                 | Medicare<br>CPT 66710                   |
| Endolaser                                              | \$5,909.70      | (5177-6327)                            | Uniform (5319,6501)                                 | Medicare<br>CPT 67108                   |
| Extended ophthalmoscopy                                | \$27.72         | (24-30)                                | Uniform (25,30)                                     | Medicare<br>CPT 92225                   |
| Fluorescein angiography                                | \$87.84         | (100-122)                              | Uniform (79,97)                                     | Medicare<br>CPT 92235                   |
| Focal/grid laser                                       | \$531.71        | (472-577)                              | Uniform (479,585)                                   | Medicare<br>CPT 67210                   |
| Fundus photography                                     | \$58.32         | (72-87)                                | Uniform (52,64)                                     | Medicare<br>CPT 92250                   |
| Intravitreal injection procedure                       | \$104.40        | (93-114)                               | Uniform (94,115)                                    | Medicare<br>CPT 67028                   |
| Bevacizumab drug (repackaged 1.25mg/0.05 mL)           | \$63.72         | (57-70)                                | Uniform (57,70)                                     | HHS<br>Report <sup>2</sup>              |
| Ranibizumab drug (0.05-mg)                             | \$1,866.82      | (1755-2145)                            | Uniform (1680,2054)                                 | Medicare<br>pricing files<br>of ASP +6% |

|                                                            |            |             |                     |                                                             |
|------------------------------------------------------------|------------|-------------|---------------------|-------------------------------------------------------------|
| Laser Retinopexy                                           | \$542.15   | (480-587)   | Uniform (488,596)   | Medicare<br>CPT 6585                                        |
| Laser Trabeculoplasty                                      | \$252.00   | (227-277)   | Uniform (227,277)   | Medicare<br>CPT 67145                                       |
| Optical coherence tomography                               | \$42.48    | (41-50)     | Uniform (38,47)     | Medicare<br>CPT 92134                                       |
| Oculomotor Surgery                                         | \$713.87   | (642-785)   | Uniform (642,785)   | Medicare<br>CPTs<br>67311,<br>67312,<br>67314, and<br>67316 |
| Paracentesis                                               | \$123.12   | (109-133)   | Uniform (111,135)   | Medicare<br>CPT 65800                                       |
| Panretinal photocoagulation                                | \$351.00   | (311-380)   | Uniform (316,386)   | Medicare<br>CPT 67228                                       |
| Retinal cryopexy                                           | \$336.96   | (714-873)   | Uniform (303,371)   | Medicare<br>CPT 67101                                       |
| Retinal detachment repair-injection of<br>air/gas          | \$2,745.19 | (2207-2697) | Uniform (2471,3020) | Medicare<br>CPT 67110                                       |
| Silicone oil injection                                     | \$3,629.26 | (3099-3787) | Uniform (3266,3992) | Medicare<br>CPT 67025                                       |
| Subtenons triamcinolone acetonide<br>injection for uveitis | \$99.36    | (88-108)    | Uniform (89,109)    | Medicare<br>CPT 67515                                       |
| Total air-fluid exchange                                   | \$3,629.26 | (3099-3787) | Uniform (3266,3992) | Medicare<br>CPT 67025                                       |
| Ocular ultrasound                                          | \$76.68    | (84-103)    | Uniform (69,84)     | Medicare<br>CPT 76512                                       |
| Vitrectomy                                                 | \$5,602.62 | (3344-4087) | Uniform (5042,6163) | Medicare<br>CPT 67036                                       |
| vitrectomy with endolaser                                  | \$5,668.14 | (4874-5957) | Uniform (5101,6235) | Medicare<br>CPT 67039                                       |

|                                                                       |            |             |                                           |                       |
|-----------------------------------------------------------------------|------------|-------------|-------------------------------------------|-----------------------|
| Vitrectomy with epiretinal membrane peel                              | \$5,860.38 | (3574-4368) | Uniform (5274,6446)                       | Medicare CPT 67041    |
| YAG capsulotomy                                                       | \$338.40   | (305-372)   | Uniform (305,372)                         | Medicare CPT 66821    |
| <b>Annual Costs (first year)</b>                                      |            |             |                                           |                       |
| Myocardial infarction                                                 | \$0        | (0-53,764)  | Not in probabilistic sensitivity analysis | Bonafede <sup>3</sup> |
| Cerebrovascular accident                                              | \$0        | (0-59,147)  | Not in probabilistic sensitivity analysis | Bonafede              |
| <b>Annual Costs (year 2)</b>                                          |            |             |                                           |                       |
| Myocardial infarction                                                 | \$0        | (0-19,615)  | Not in probabilistic sensitivity analysis | Bonafede              |
| Cerebrovascular accident                                              | \$0        | (0-37,007)  | Not in probabilistic sensitivity analysis | Bonafede              |
| <b>Other</b>                                                          |            |             |                                           |                       |
| Discount rate                                                         | 3%         | (0-5)       |                                           |                       |
| Vision change per year (lines) with ranibizumab                       | 0          | (-1 1)      | Uniform (-1,1)                            | Assumption            |
| Vision change per year (lines) with panretinal photocoagulation       | 0          | (-1 1)      | Uniform (-1,1)                            | Assumption            |
| Annual injections after year 5 with ranibizumab                       | 3          | (1.5-4.5)   | Uniform (1.5,4.5)                         | Assumption            |
| <b>Utility associated with visual acuity in the better-seeing eye</b> |            |             |                                           |                       |
| 20/20                                                                 | 0.92       | (0.87-0.97) | Normal (0.92,0.025)*                      | Brown <sup>4</sup>    |
| 20/25                                                                 | 0.87       | (0.82-0.92) | Normal (0.87,0.025)*                      | Brown                 |
| 20/30                                                                 | 0.84       | (0.79-0.89) | Normal (0.84,0.025)*                      | Brown                 |
| 20/40                                                                 | 0.8        | (0.74-0.86) | Normal (0.8,0.03)*                        | Brown                 |
| 20/50                                                                 | 0.77       | (0.7-0.84)  | Normal (0.77,0.035)*                      | Brown                 |
| 20/70                                                                 | 0.74       | (0.67-0.81) | Normal (0.74,0.035)*                      | Brown                 |
| 20/100                                                                | 0.67       | (0.57-0.77) | Normal (0.67,0.05)*                       | Brown                 |
| 20/200                                                                | 0.66       | (0.55-0.77) | Normal (0.66,0.055)*                      | Brown                 |

|        |      |             |                      |       |
|--------|------|-------------|----------------------|-------|
| 20/300 | 0.63 | (0.54-0.72) | Normal (0.63,0.045)* | Brown |
| 20/400 | 0.54 | (0.43-0.65) | Normal (0.54,0.055)* | Brown |

CPT, current procedural terminology

\* All utilities were correlated with a correlation coefficient of 0.75 to preserve the relative ranking of the vision states.

## Note on Mortality

The mean age of this population when they started the study was 52. The mortality rate of diabetics is about twice that of the general population and with annual mortality ranges between ages 52 and 62 of approximately 0.5% to 1% per year, we would expect about 6% of the population would die within 5 years and 13% of the population would die over that whole 10-year period. We observed that approximately 9% of participants did die within 5 years. We accounted for actual observed mortality within the first 5 years based on the trial mortality data but, we simulate mortality in years 5-10. It is difficult to speculate on what long-term differential mortality might be between the ranibizumab and panretinal photocoagulation groups between years 5 and 10. Therefore we assumed both groups have the same mortality, which is based on standard US mortality and a relative risk from having diabetes.

Given that someone is alive at the end of year 5, the following are the probabilities of survival at the end of each year:

| End of Year             | 6     | 7     | 8     | 9     | 10    |
|-------------------------|-------|-------|-------|-------|-------|
| Probability of Survival | 0.985 | 0.970 | 0.953 | 0.936 | 0.918 |

**eTable 2. Details on Procedure Costing**

| Parameter                                                              | Source CPT/<br>HCPCS <sup>†</sup> | Physician<br>Non<br>Facility<br>Fee | Physician<br>Facility<br>Fee | OPPS<br>Payment | Anesthesia<br>Fees | Facility* | Total<br>Cost |
|------------------------------------------------------------------------|-----------------------------------|-------------------------------------|------------------------------|-----------------|--------------------|-----------|---------------|
| Aqueous tap                                                            | 65800                             | \$123.12                            | \$93.96                      | \$1,910.36      | N/A                | 0         | \$123.12      |
| Cataract<br>extraction with<br>intraocular lense<br>placement          | 66984 +<br>Anesthesia             | \$656.27                            | \$656.27                     | \$1,910.36      | 712.736            | 1         | \$3,279.37    |
| Cataract<br>extraction without<br>intraocular lens<br>placement        | 66984                             | \$656.27                            | \$656.27                     | \$1,910.36      | N/A                | 1         | \$2,566.63    |
| Diode laser (open<br>angle glaucoma)                                   | 66710                             | \$453.59                            | \$403.56                     | \$1,811.35      | N/A                | 1         | \$2,214.91    |
| Endolaser                                                              | 67108 +<br>Anesthesia             | \$1,231.91                          | \$1,231.91                   | \$3,608.69      | 1069.10            | 1         | \$5,909.70    |
| Extended<br>ophthalmoscopy                                             | 92225                             | \$27.72                             | \$21.96                      | \$55.96         | N/A                | 0         | \$27.72       |
| Fluorescein<br>angiography                                             | 92235                             | \$87.84                             | \$87.84                      | \$248.83        | N/A                | 0         | \$87.84       |
| Focal/grid laser<br>(non-center<br>involved diabetic<br>macular edema) | 67210                             | \$531.71                            | \$514.07                     | \$487.98        | N/A                | 0         | \$531.71      |
| Fundus<br>photography                                                  | 92250                             | \$58.32                             | \$58.32                      | \$105.04        | N/A                | 0         | \$58.32       |

|                                                |                                           |          |          |            |     |    |            |
|------------------------------------------------|-------------------------------------------|----------|----------|------------|-----|----|------------|
| Intravitreal injection procedure               | 67028                                     | \$104.40 | \$102.96 | \$297.57   | N/A | 0  | \$104.40   |
| Bevacizumab drug (repackaged 1.25mg/0.05 mL)   |                                           |          |          |            |     |    | \$63.72    |
| Ranibizumab drug (0.05-mg)                     |                                           |          |          |            |     |    | \$1,866.82 |
| Laser retinopexy                               | 67145                                     | \$542.15 | \$511.55 | \$487.98   | N/A | 0  | \$542.15   |
| Laser trabeculoplasty                          |                                           | \$252.00 | \$213.48 | \$487.98   | N/A | 0  | \$252.00   |
| Ocular coherence tomography                    | 92134                                     | \$42.48  | \$42.48  | \$55.96    | N/A | 0  | \$42.48    |
| Oculomotor surgery                             | Average of 67311, 67312, 67314, and 67316 | \$713.87 | \$713.87 | \$2,096.37 | N/A | No | \$713.87   |
| Paracentesis                                   | 65800                                     | \$123.12 | \$93.96  | \$1,910.36 | N/A | 0  | \$123.12   |
| Panretinal photocoagulation                    | 67228                                     | \$351.00 | \$315.00 | \$487.98   | N/A | 0  | \$351.00   |
| Retinal cryopexy                               | 67101                                     | \$336.96 | \$292.68 | \$1,910.36 | N/A | 0  | \$336.96   |
| Retinal detachment repair-injection of air/gas | 67110                                     | \$899.63 | \$834.83 | \$1,910.36 | N/A | 1  | \$2,745.19 |



|                                          |                    |            |            |            |          |   |            |
|------------------------------------------|--------------------|------------|------------|------------|----------|---|------------|
| Silicone oil injection                   | 67025 + Anesthesia | \$746.27   | \$649.79   | \$1,910.36 | 1069.104 | 1 | \$3,629.26 |
| Subtenons kenalog injection for uveitis  | 67515              | \$99.36    | \$91.44    | \$267.66   | N/A      | 0 | \$99.36    |
| Total air-fluid exchange                 | 67025 + Anesthesia | \$746.27   | \$649.79   | \$1,910.36 | 1069.104 | 1 | \$3,629.26 |
| Ultrasound                               | 76512              | \$76.68    | \$76.68    | \$114.46   | N/A      | 0 | \$76.68    |
| Vitrectomy                               | 67036+ Anesthesia  | \$924.83   | \$924.83   | \$3,608.69 | 1069.104 | 1 | \$5,602.62 |
| Vitrectomy with endolaser                | 67039 + Anesthesia | \$990.35   | \$990.35   | \$3,608.69 | 1069.104 | 1 | \$5,668.14 |
| Vitrectomy with epiretinal membrane peel | 67041 + Anesthesia | \$1,182.59 | \$1,182.59 | \$3,608.69 | 1069.104 | 1 | \$5,860.38 |
| YAG capsulotomy                          | 66821              | \$338.40   | \$319.32   | \$487.98   | N/A      | 0 | \$338.40   |

CPT, current procedural terminology; HCPCS, Healthcare Common Procedure Coding System; OPPS, Outpatient Prospective Payment System

\*One if performed in a facility, 0 otherwise.

†All anesthesia was assumed to use CPT 00145 and billed for 2 hours.

**eTable 3. Baseline Characteristics of the Study Population**

|                                                                | With Vision-Impairing CI-DME at Baseline |                     | Without Vision-Impairing CI-DME at Baseline |                     |
|----------------------------------------------------------------|------------------------------------------|---------------------|---------------------------------------------|---------------------|
|                                                                | Ranibizumab                              | PRP                 | Ranibizumab                                 | PRP                 |
| <b>Participant characteristics</b>                             |                                          |                     |                                             |                     |
| Participants with 1 study eye (included in this analysis), No. | 21                                       | 25                  | 80                                          | 87                  |
| Female, No. (%)                                                | 6 (29)                                   | 13 (52)             | 36 (45)                                     | 37 (43)             |
| Age, Median (IQR), y                                           | 56 (52-61)                               | 56 (49-62)          | 54 (45-60)                                  | 52 (45-60)          |
| Race/ethnicity, No. (%)                                        |                                          |                     |                                             |                     |
| White                                                          | 11 (52)                                  | 16 (64)             | 47 (59)                                     | 43 (49)             |
| Hispanic or Latino                                             | 7 (33)                                   | 6 (24)              | 20 (25)                                     | 23 (26)             |
| Black/African American                                         | 3 (14)                                   | 2 (8)               | 12 (15)                                     | 18 (21)             |
| Other                                                          | 0 (0)                                    | 1 (4)               | 1 (1)                                       | 3 (3)               |
| Diabetes type, No. (%)                                         |                                          |                     |                                             |                     |
| Type 1                                                         | 3 (14)                                   | 5 (20)              | 17 (21)                                     | 14 (16)             |
| Type 2                                                         | 17 (81)                                  | 18 (72)             | 59 (74)                                     | 71 (82)             |
| Uncertain                                                      | 1 (5)                                    | 2 (8)               | 4 (5)                                       | 2 (2)               |
| Duration of diabetes, median (IQR), y                          | 15 (11-21)                               | 11 (7-27)           | 20 (13-27)                                  | 16 (11-23)          |
| Hemoglobin A1c, median (IQR), %                                | 7.8 (7-9.3)                              | 7.8 (7.1-9.6)       | 8.3 (7-9.8)                                 | 8.9 (7.3-10.3)      |
| <b>Ocular characteristics</b>                                  |                                          |                     |                                             |                     |
| Baseline visual acuity letter score, mean                      | 62.1                                     | 63.9                | 77.3                                        | 78.4                |
| Median (IQR)                                                   | 64 (57-76)                               | 71 (57-74)          | 80 (74-85)                                  | 81 (74-85)          |
| Approximate Snellen equivalent, median (IQR)                   | 20/50 (20/80–20/32)                      | 20/40 (20/80–20/32) | 20/25 (20/32–20/20)                         | 20/25 (20/32–20/20) |

|                                                                                                  |               |               |               |               |
|--------------------------------------------------------------------------------------------------|---------------|---------------|---------------|---------------|
| No. (%) with visual acuity letter score                                                          |               |               |               |               |
| ≥84 (≥20/20)                                                                                     | 0 (0)         | 0 (0)         | 31 (39)       | 35 (40)       |
| 83-79 (20/25)                                                                                    | 0 (0)         | 0 (0)         | 17 (21)       | 18 (21)       |
| 78-69 (20/32-20/40)                                                                              | 10 (48)       | 14 (56)       | 19 (24)       | 21 (24)       |
| 68-49 (20/50-20/100)                                                                             | 6 (29)        | 7 (28)        | 10 (13)       | 12 (14)       |
| 48-24 (20/125-20/320)                                                                            | 5 (24)        | 4 (16)        | 3 (4)         | 1 (1)         |
| OCT central subfield thickness (Stratus equivalent), μm                                          |               |               |               |               |
| Mean                                                                                             | 417.4         | 327.2         | 213.7         | 219.6         |
| Median (IQR)                                                                                     | 365 (333-504) | 296 (270-319) | 210 (193-235) | 222 (200-237) |
| Diabetic retinopathy severity (ETDRS level), No. (%), as determined by photograph reading center |               |               |               |               |
| NPDR or better (level 53 or better)                                                              | 0 (0)         | 2 (8)         | 7 (9)         | 12 (14)       |
| Mild PDR (level 61)                                                                              | 2 (10)        | 3 (12)        | 12 (15)       | 13 (15)       |
| Moderate PDR (level 65)                                                                          | 7 (33)        | 11 (44)       | 28 (35)       | 34 (39)       |
| High-risk PDR (level 71 and 75)                                                                  | 12 (57)       | 9 (36)        | 30 (38)       | 26 (30)       |
| Advanced PDR, macula center attached (level 81)                                                  | 0 (0)         | 0 (0)         | 2 (3)         | 0 (0)         |
| Advanced PDR, macula center detached (level 85)                                                  | 0 (0)         | 0 (0)         | 0 (0)         | 1 (1)         |
| Prior treatment for DME, No. (%)                                                                 | 5 (24)        | 7 (28)        | 21 (26)       | 16 (18)       |
| Prior anti-VEGF treatment for DME, No. (%)                                                       | 4 (19)        | 2 (8)         | 9 (11)        | 6 (7)         |

CI-DME, center-involved diabetic macular edema; PRP, panretinal photocoagulation; IQR, interquartile range; OCT, optical coherence tomography; ETDRS, Early Treatment Diabetic Retinopathy Study; NPDR, non-proliferative diabetic retinopathy; PDR, proliferative diabetic retinopathy; DME, diabetic macular edema; VEGF, vascular endothelial growth factor

**eTable 4. Change in QALYs\***

|                                 | With vision-impairing center-involved DME at baseline |                         |                          | Without vision-impairing center-involved DME at baseline |                          |                         |
|---------------------------------|-------------------------------------------------------|-------------------------|--------------------------|----------------------------------------------------------|--------------------------|-------------------------|
|                                 | PRP<br>(N = 25)                                       | Ranibizumab<br>(N = 21) | Difference               | PRP<br>(N = 87)                                          | Ranibizumab<br>(N = 80)  | Difference              |
| <b>Results over 5 Years</b>     |                                                       |                         |                          |                                                          |                          |                         |
| <b>Change in QALYS (95% CI)</b> | -0.016<br>(-0.042, 0.01)                              | 0.142<br>(0.116, 0.168) | 0.159<br>(-0.017, 0.335) | -0.028<br>(-0.062, 0.006)                                | 0.016<br>(-0.015, 0.047) | 0.044<br>(-0.002, 0.09) |
| <b>Results over 10 Years</b>    |                                                       |                         |                          |                                                          |                          |                         |
| <b>Change in QALYS (95% CI)</b> | -0.062<br>(-0.114, -0.01)                             | 0.219<br>(0.163, 0.274) | 0.281<br>(-0.083, 0.644) | -0.038<br>(-0.104, 0.027)                                | 0.052<br>(0.003, 0.102)  | 0.091<br>(0.009, 0.173) |

QALY, quality-adjusted life-years; DME, diabetic macular edema; PRP, panretinal photocoagulation; CI, confidence interval  
 \*Utilities converted from visual acuity in the treated eye.

**eTable 5. Cost-Effectiveness Results\***

|                              | With vision-impairing center-involved DME at baseline |                         |                             | Without vision-impairing center-involved DME at baseline |                         |                              |
|------------------------------|-------------------------------------------------------|-------------------------|-----------------------------|----------------------------------------------------------|-------------------------|------------------------------|
|                              | PRP<br>(N = 25)                                       | Ranibizumab<br>(N = 21) | Difference                  | PRP<br>(N = 87)                                          | Ranibizumab<br>(N = 80) | Difference                   |
| <b>Results over 5 Years</b>  |                                                       |                         |                             |                                                          |                         |                              |
| <b>Costs</b>                 | \$22,355                                              | \$40,825                | \$18,470<br>(6,320; 30,619) | \$8,887                                                  | \$32,300                | \$23,413<br>(18,567; 28,258) |
| <b>QALYs</b>                 | -0.016                                                | 0.142                   | 0.159<br>(-0.017,0.335)     | -0.028                                                   | 0.016                   | 0.044<br>(-0.002,0.09)       |
| <b>ICER</b>                  |                                                       |                         | \$116,352/QALY              |                                                          |                         | \$534,352/QALY               |
| <b>Results over 10 Years</b> |                                                       |                         |                             |                                                          |                         |                              |
| <b>Costs</b>                 | \$28,889                                              | \$60,979                | \$32,090<br>(20486;43693)   | \$9,509                                                  | \$53,183                | \$43,675<br>(38849;48500)    |
| <b>QALYs</b>                 | -0.062                                                | 0.219                   | 0.281<br>(-0.083,0.644)     | -0.038                                                   | 0.052                   | 0.091<br>(0.009,0.173)       |
| <b>ICER</b>                  |                                                       |                         | \$114,281/QALY              |                                                          |                         | \$482,109/QALY               |

DME, diabetic macular edema; PRP, panretinal photocoagulation; QALY, quality-adjusted life-years; ICER, Incremental cost-effectiveness ratios

\*Utilities converted from visual acuity in treated eye.

**eTable 6. Scenario Analysis: Including Costs of Systemic Adverse Events**

|                                                               | With vision-impairing CI-DME* at baseline    |                                         | Without vision-impairing CI-DME at baseline |                        |
|---------------------------------------------------------------|----------------------------------------------|-----------------------------------------|---------------------------------------------|------------------------|
|                                                               | PRP for PDR, Ranibizumab for CI-DME (N = 25) | Ranibizumab for PDR and CI-DME (N = 21) | PRP (N = 87)                                | Ranibizumab (N = 80)   |
| <b>Five years of follow-up</b>                                |                                              |                                         |                                             |                        |
| Clinic visits/diagnostic procedures                           | 1282                                         | 1954                                    | 1051                                        | 1971                   |
| Panretinal Photocoagulation                                   | 351                                          | 16                                      | 351                                         | 21                     |
| Anti-VEGF Injection Procedure                                 | 947                                          | 1916                                    | 255                                         | 1542                   |
| 0.5-mg ranibizumab                                            | 16925                                        | 34264                                   | 4562                                        | 27572                  |
| Vitrectomies                                                  | 1096                                         | 1336                                    | 1404                                        | 387                    |
| Other Intraocular Therapies‡                                  | 1755                                         | 1338                                    | 1264                                        | 807                    |
| Systemic Adverse Events†                                      | 13266                                        | 24734                                   | 11606                                       | 13831                  |
| <b>TOTAL</b>                                                  | 35622<br>(15910,55334)                       | 65559 (36897,94221)                     | 20493<br>(12249,28738)                      | 46131<br>(36454,55808) |
| <b>QALYs</b>                                                  | 0.017                                        | 0.299                                   | 0.015                                       | 0.055                  |
| <b>ICER</b>                                                   |                                              | 106,289/QALY                            |                                             | 637,613/QALY           |
| <b>Simulated 10 years</b>                                     |                                              |                                         |                                             |                        |
| Additional costs of Ranibizumab Injection Procedures and Drug | 6534                                         | 20154                                   | 621                                         | 20883                  |
| Additional long-term costs of Systemic Adverse Events†        | 12425                                        | 19156                                   | 11872                                       | 12911                  |

|              |                        |                          |                        |                        |
|--------------|------------------------|--------------------------|------------------------|------------------------|
| <b>TOTAL</b> | 54003<br>(18812,89195) | 100241<br>(58641,141841) | 31533<br>(16474,46591) | 79325<br>(62107,96543) |
| QALYs        | 0.039                  | 0.541                    | 0.040                  | 0.098                  |
| ICER         |                        | 92,114/QALY              |                        | 812,185/QALY           |

CI-DME, center involved diabetic macular edema; PRP, panretinal photocoagulation; Anti-VEGF, anti-vascular endothelial growth factor; CI, confidence interval; QALY, quality-adjusted life year; ICER, incremental cost-effectiveness ratios; PDR, proliferative diabetic retinopathy

\* With visual acuity letter score less than 78 (approximate Snellen equivalent 20/32 or worse) at baseline

‡ Includes treatment for ocular adverse events like endophthalmitis

†systemic adverse events include myocardial infarction and cerebrovascular accident.

Participants in all group received 0.5-mg ranibizumab if they developed DME over the 2 years of the trial.

Note: Individuals who died had a utility of 0 after the date of death. In converting from best-corrected visual acuity, letter scores were converted to Snellen visual acuities and then to utility levels using the mapping from Brown et al.<sup>4</sup>



**eTable 7a. Incremental Cost-Effectiveness Ratio Values as Each Parameter Assumption is Changed From Low to High, One-at-a-Time**

| Parameter\Parameter Value                                     | With center-involved DME and vision loss |           | Without center-involved DME and vision loss |            |
|---------------------------------------------------------------|------------------------------------------|-----------|---------------------------------------------|------------|
|                                                               | Low                                      | High      | Low                                         | High       |
| <b>Unit Costs (per procedure)</b>                             |                                          |           |                                             |            |
| Aqueous tap                                                   | \$ 63,930                                | \$ 63,930 | \$ 742,199                                  | \$ 742,204 |
| Cataract extraction with intraocular lens placement           | \$ 63,965                                | \$ 63,895 | \$ 742,522                                  | \$ 741,881 |
| Cataract extraction without intraocular lens placement        | \$ 63,950                                | \$ 63,910 | \$ 742,202                                  | \$ 742,202 |
| Diode laser (open angle glaucoma)                             | \$ 63,947                                | \$ 63,913 | \$ 742,202                                  | \$ 742,202 |
| Endolaser                                                     | \$ 63,822                                | \$ 64,037 | \$ 741,972                                  | \$ 742,431 |
| Extended ophthalmoscopy                                       | \$ 63,900                                | \$ 63,959 | \$ 741,603                                  | \$ 742,800 |
| Fluorescein angiography                                       | \$ 63,928                                | \$ 63,931 | \$ 742,161                                  | \$ 742,243 |
| Focal/grid laser (non-center involved diabetic macular edema) | \$ 63,934                                | \$ 63,926 | \$ 742,211                                  | \$ 742,192 |
| Fundus photography                                            | \$ 63,900                                | \$ 63,959 | \$ 742,107                                  | \$ 742,296 |
| Injection Procedure                                           | \$ 63,592                                | \$ 64,268 | \$ 738,202                                  | \$ 746,201 |
| Bevacizumab drug (repackaged 1.25mg/0.05 mL)                  | \$ 63,929                                | \$ 63,930 | \$ 742,211                                  | \$ 742,192 |
| Ranibizumab drug (0.5-mg)                                     | \$ 57,920                                | \$ 69,939 | \$ 670,375                                  | \$ 814,028 |
| Laser retinopexy                                              | \$ 63,930                                | \$ 63,930 | \$ 742,190                                  | \$ 742,213 |
| Laser trabeculoplasty                                         | \$ 63,930                                | \$ 63,930 | \$ 742,196                                  | \$ 742,207 |
| Optical coherence tomography                                  | \$ 63,856                                | \$ 64,004 | \$ 741,363                                  | \$ 743,040 |
| Oculomotor surgery                                            | \$ 63,930                                | \$ 63,930 | \$ 742,188                                  | \$ 742,215 |
| Paracentesis                                                  | \$ 63,931                                | \$ 63,929 | \$ 742,194                                  | \$ 742,209 |
| Panretinal photocoagulation                                   | \$ 64,048                                | \$ 63,812 | \$ 743,366                                  | \$ 741,037 |
| Retinal cryopexy                                              | \$ 63,930                                | \$ 63,930 | \$ 742,208                                  | \$ 742,195 |

|                                                                       |           |           |              |              |
|-----------------------------------------------------------------------|-----------|-----------|--------------|--------------|
| Retinal detachment repair-injection of air/gas                        | \$ 63,904 | \$ 63,956 | \$ 742,202   | \$ 742,202   |
| Silicone oil injection                                                | \$ 63,958 | \$ 63,902 | \$ 742,202   | \$ 742,202   |
| Subtenons kenalog injection for uveitis                               | \$ 63,930 | \$ 63,930 | \$ 742,203   | \$ 742,200   |
| Total air-fluid exchange                                              | \$ 63,930 | \$ 63,930 | \$ 742,270   | \$ 742,133   |
| Ultrasound                                                            | \$ 63,931 | \$ 63,929 | \$ 742,212   | \$ 742,191   |
| Vitrectomy                                                            | \$ 64,016 | \$ 63,843 | \$ 742,619   | \$ 741,784   |
| Vitrectomy with endolaser                                             | \$ 63,851 | \$ 64,009 | \$ 742,949   | \$ 741,454   |
| Vitrectomy with epiretinal membrane peel                              | \$ 63,874 | \$ 63,985 | \$ 742,764   | \$ 741,639   |
| YAG capsulotomy                                                       | \$ 63,926 | \$ 63,933 | \$ 742,207   | \$ 742,196   |
| <b>Other</b>                                                          |           |           |              |              |
| Discount rate                                                         | \$ 64,075 | \$ 63,982 | \$ 766,002   | \$ 728,975   |
| Vision change per year (lines) with Ranibizumab                       | \$ 74,548 | \$ 57,583 | \$ 5,314,927 | \$ 373,541   |
| Vision change per year (lines) with PRP                               | \$ 57,043 | \$ 74,236 | \$ 375,100   | \$ 1,405,575 |
| Annual injections after year 5 with Ranibizumab                       | \$ 43,854 | \$ 84,005 | \$ 564,756   | \$ 919,647   |
| <b>Utility associated with visual acuity in the better-seeing eye</b> |           |           |              |              |
| 20/20                                                                 | \$ 80,680 | \$ 52,939 | \$ 701,596   | \$ 787,796   |
| 20/25                                                                 | \$ 73,210 | \$ 56,738 | \$ 875,954   | \$ 643,885   |
| 20/30                                                                 | \$ 54,807 | \$ 76,696 | \$ 909,088   | \$ 627,084   |
| 20/40                                                                 | \$ 76,146 | \$ 55,091 | \$ 754,455   | \$ 730,339   |
| 20/50                                                                 | \$ 58,555 | \$ 70,391 | \$ 590,650   | \$ 998,368   |
| 20/70                                                                 | \$ 53,142 | \$ 80,212 | \$ 806,226   | \$ 687,597   |
| 20/100                                                                | \$ 57,637 | \$ 71,765 | \$ 521,110   | \$ 1,289,149 |
| 20/200                                                                | \$ 58,677 | \$ 70,215 | \$ 740,624   | \$ 743,786   |
| 20/300                                                                | \$ 64,558 | \$ 63,314 | \$ 738,324   | \$ 746,120   |
| 20/400                                                                | \$ 63,930 | \$ 63,930 | \$ 742,202   | \$ 742,202   |

DME, diabetic macular edema; PRP, panretinal photocoagulation

**eTable 7b. Incremental Cost-Effectiveness Ratio Values as Each Parameter Assumption is Changed From Low to High, One-at-a-Time\***

| Parameter\Parameter Value                                     | With Center-involved DME and vision Loss |            | Without Center-involved DME and Vision Loss |            |
|---------------------------------------------------------------|------------------------------------------|------------|---------------------------------------------|------------|
|                                                               | Low                                      | High       | Low                                         | High       |
| <b>Unit Costs (per procedure)</b>                             |                                          |            |                                             |            |
| Aqueous tap                                                   | \$ 114,281                               | \$ 114,281 | \$ 482,108                                  | \$ 482,111 |
| Cataract extraction with intraocular lens placement           | \$ 114,344                               | \$ 114,219 | \$ 482,318                                  | \$ 481,901 |
| Cataract extraction without intraocular lens placement        | \$ 114,317                               | \$ 114,246 | \$ 482,109                                  | \$ 482,109 |
| Diode laser (open angle glaucoma)                             | \$ 114,312                               | \$ 114,251 | \$ 482,109                                  | \$ 482,109 |
| Endolaser                                                     | \$ 114,089                               | \$ 114,473 | \$ 481,960                                  | \$ 482,258 |
| Extended ophthalmoscopy                                       | \$ 114,228                               | \$ 114,334 | \$ 481,720                                  | \$ 482,498 |
| Fluorescein angiography                                       | \$ 114,278                               | \$ 114,284 | \$ 482,083                                  | \$ 482,136 |
| Focal/grid laser (non-center involved diabetic macular edema) | \$ 114,289                               | \$ 114,274 | \$ 482,116                                  | \$ 482,103 |
| Fundus photography                                            | \$ 114,229                               | \$ 114,334 | \$ 482,048                                  | \$ 482,171 |
| Injection procedure                                           | \$ 113,677                               | \$ 114,886 | \$ 479,511                                  | \$ 484,707 |
| Bevacizumab drug (repackaged 1.25mg/0.05 mL)                  | \$ 114,280                               | \$ 114,282 | \$ 482,115                                  | \$ 482,103 |
| Ranibizumab drug (0.5-mg)                                     | \$ 103,538                               | \$ 125,024 | \$ 435,453                                  | \$ 528,766 |
| Laser retinopexy                                              | \$ 114,281                               | \$ 114,281 | \$ 482,102                                  | \$ 482,117 |
| Laser trabeculoplasty                                         | \$ 114,281                               | \$ 114,281 | \$ 482,106                                  | \$ 482,113 |
| Optical coherence tomography                                  | \$ 114,149                               | \$ 114,413 | \$ 481,565                                  | \$ 482,654 |

|                                                                       |            |            |            |            |
|-----------------------------------------------------------------------|------------|------------|------------|------------|
| Oculomotor surgery                                                    | \$ 114,281 | \$ 114,281 | \$ 482,101 | \$ 482,118 |
| Paracentesis                                                          | \$ 114,283 | \$ 114,279 | \$ 482,105 | \$ 482,114 |
| Panretinal photocoagulation                                           | \$ 114,492 | \$ 114,070 | \$ 482,866 | \$ 481,353 |
| Retinal cryopexy                                                      | \$ 114,281 | \$ 114,281 | \$ 482,113 | \$ 482,105 |
| Retinal detachment repair-<br>injection of air/gas                    | \$ 114,235 | \$ 114,328 | \$ 482,109 | \$ 482,109 |
| Silicone oil injection                                                | \$ 114,331 | \$ 114,231 | \$ 482,109 | \$ 482,109 |
| Subtenons kenalog injection<br>for uveitis                            | \$ 114,281 | \$ 114,281 | \$ 482,111 | \$ 482,108 |
| Total air-fluid exchange                                              | \$ 114,281 | \$ 114,281 | \$ 482,154 | \$ 482,065 |
| Ultrasound                                                            | \$ 114,283 | \$ 114,279 | \$ 482,116 | \$ 482,103 |
| Vitrectomy                                                            | \$ 114,436 | \$ 114,126 | \$ 482,380 | \$ 481,838 |
| Vitrectomy with endolaser                                             | \$ 114,140 | \$ 114,422 | \$ 482,595 | \$ 481,624 |
| Vitrectomy with epiretinal<br>membrane peel                           | \$ 114,182 | \$ 114,381 | \$ 482,475 | \$ 481,744 |
| YAG capsulotomy                                                       | \$ 114,275 | \$ 114,287 | \$ 482,113 | \$ 482,106 |
| <b>Other</b>                                                          |            |            |            |            |
| Discount rate                                                         | \$ 114,335 | \$ 114,533 | \$ 484,279 | \$ 481,474 |
| Vision change per year<br>(lines) with ranibizumab                    | \$ 126,200 | \$ 108,158 | \$ 603,383 | \$ 441,926 |
| Vision change per year<br>(lines) with panretinal<br>photocoagulation | \$ 102,366 | \$ 127,818 | \$ 414,085 | \$ 591,603 |
| Annual Injections after year<br>5 with Ranibizumab                    | \$ 78,394  | \$ 150,168 | \$ 366,847 | \$ 597,372 |

DME, diabetic macular edema

\*Utilities converted from visual acuity in treated eye.

**eFigure 1. Two-Way Sensitivity Analysis on Utility With Good Vision (20/20 – 20/25) Versus Moderate Vision Loss (20/50-20/200)\* With (a) and Without (b) Baseline Center-Involved Diabetic Macular Edema and Vision Loss**

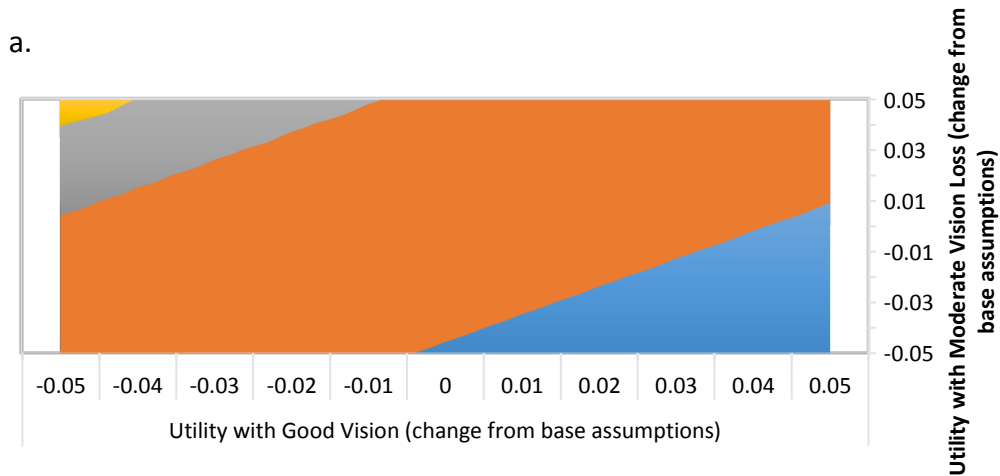

ICER of Ranibizumab vs. PRP

- \$0 - \$50,000
- \$50,000 - \$100,000
- \$100,000 - \$150,000
- \$150,000 - \$200,000

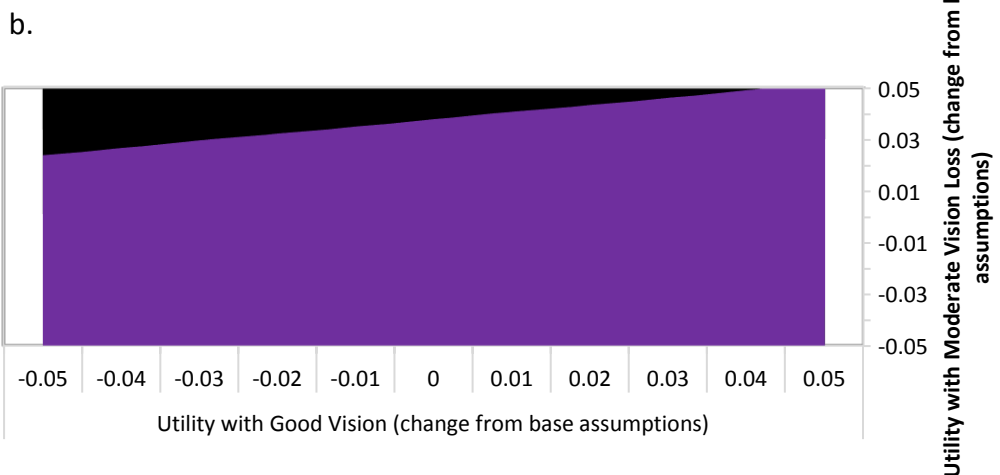

ICER of Ranibizumab vs. PRP

- \$0 - \$500,000
- \$500,000 - \$1,000,000
- \$1,000,000 - \$1,500,000

Good Vision = (20/20-20/25); Moderate Vision Loss = (20/50-20/200)

\*Utilities converted from visual acuity in better-seeing eye.

**eFigure 2. One-Way Sensitivity Analysis Varying Cost of Anti-Vascular Endothelial Growth Factor With Utilities Converted From Visual Acuity in Treated Eye Assuming Effectiveness of 0.5-mg Ranibizumab**

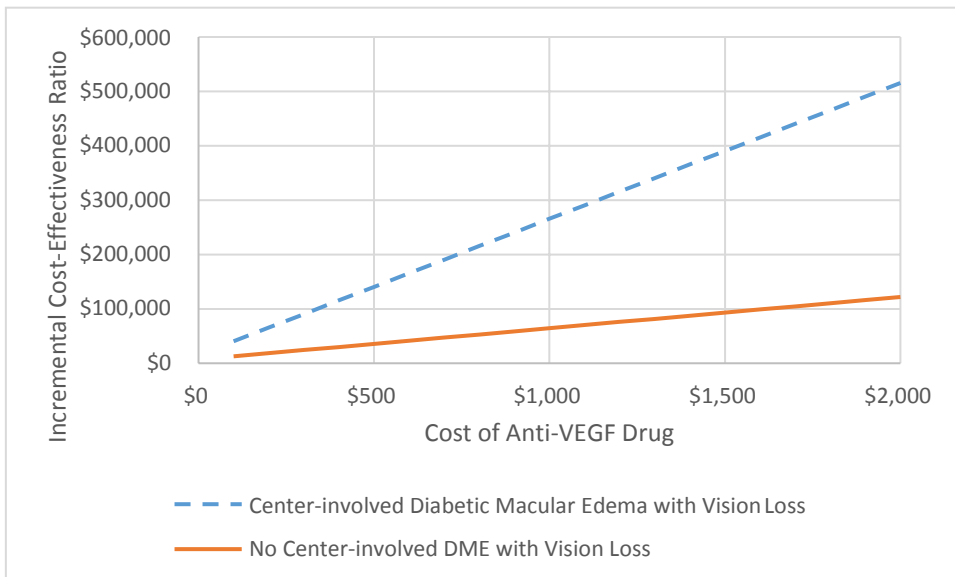

**eFigure 3. Two-Way Sensitivity Analysis on Number of Annual Injections With (a) and Without (b) Baseline Center-Involved Diabetic Macular Edema and Vision Loss\***

a.

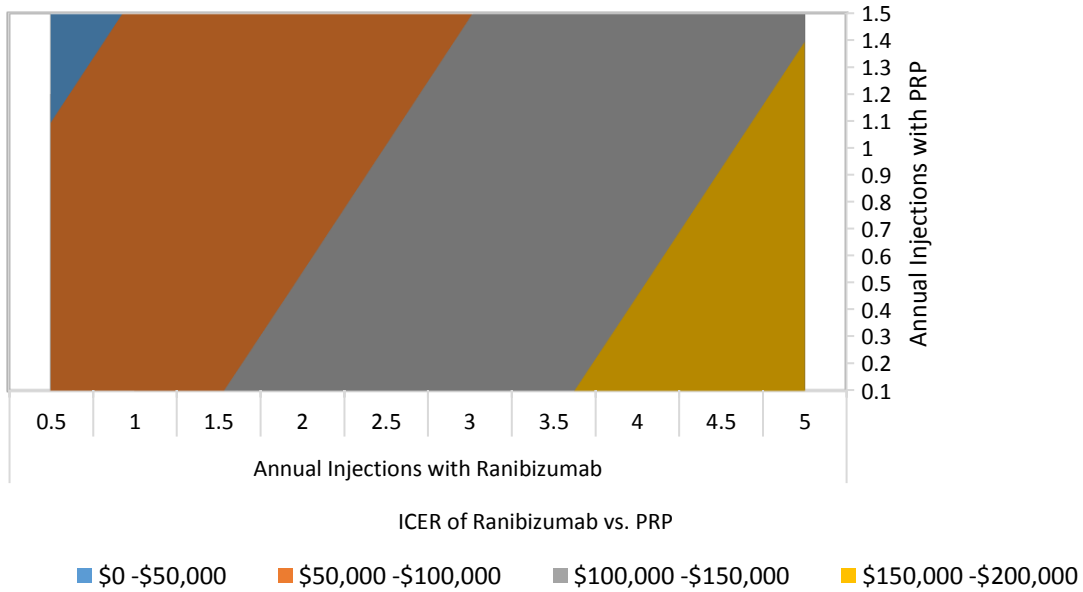

b.

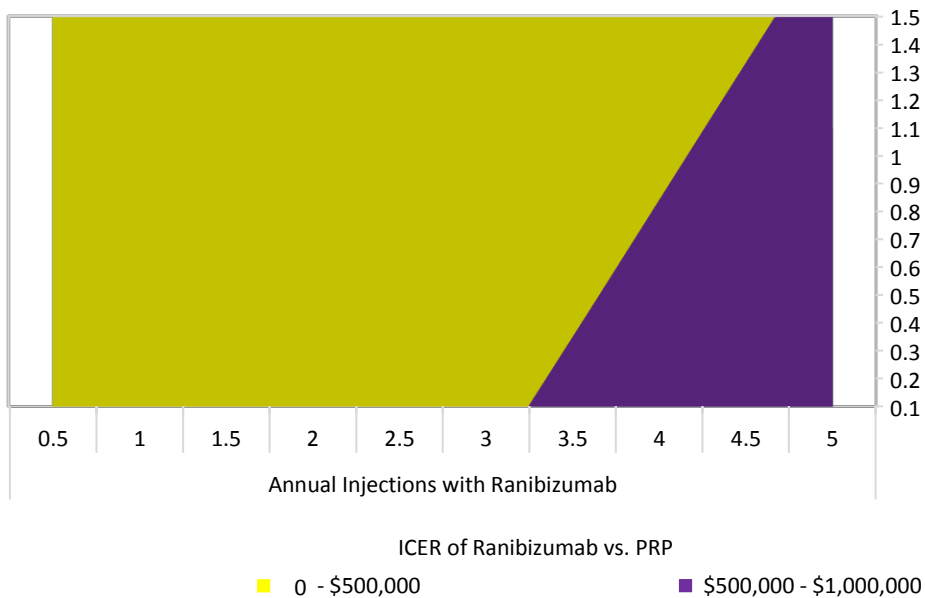

PRP, panretinal photocoagulation; ICER, Incremental Cost-Effectiveness Ratio

\*Utilities converted from visual acuity in better-seeing eye.

**eFigure 4. Two-Way Sensitivity Analysis on Utility With Moderate Vision Loss (20/50-20/200) Versus Cost of Anti-VEGF Drug Injections With (a) and Without (b) Baseline Center-Involved Diabetic Macular Edema and Vision Loss\***

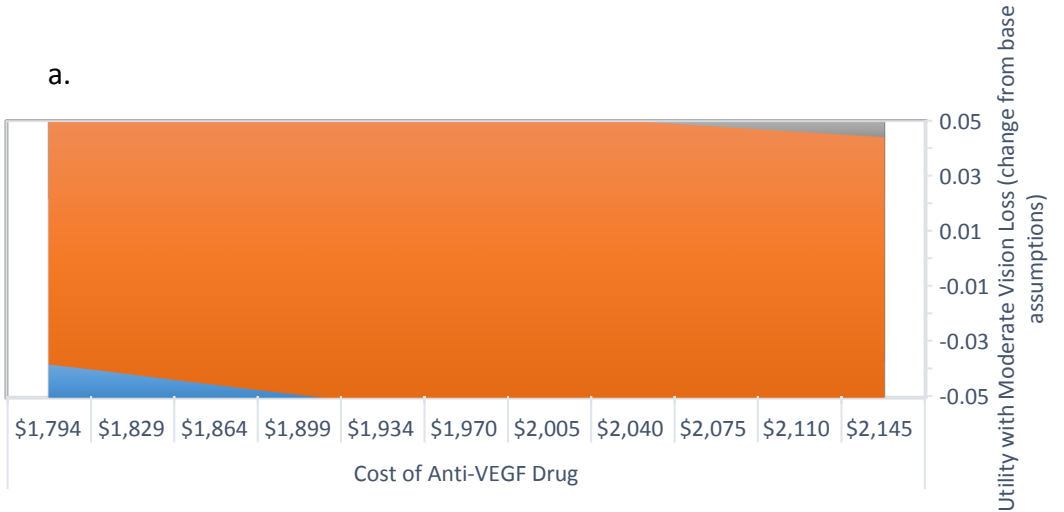

ICER of Ranibizumab vs. PRP

■ \$0 - \$50,000   ■ \$50,000 - \$100,000   ■ \$100,000 - \$150,000

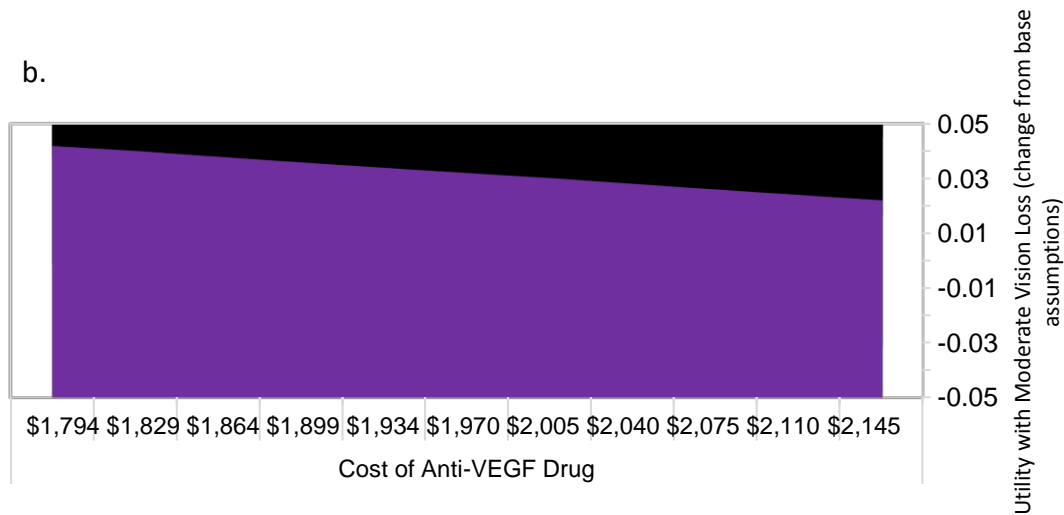

ICER of Ranibizumab vs. PRP

■ \$0 - \$500,000   ■ \$500,000 - \$1,000,000   ■ \$1,000,000 - \$1,500,000

Anti-VEGF, anti-vascular endothelial growth factor; ICER, incremental cost-effectiveness ratio; PRP, panretinal photocoagulation

\*Utilities converted from visual acuity in better-seeing eye.



**eFigure 5. Two-Way Sensitivity Analysis on Utility With Moderate Vision Loss (20/50-20/200) Versus Effectiveness in Terms of Long-term Improvements in Vision With (a) and Without (b) Baseline Center-Involved Diabetic Macular Edema and Vision Loss\***

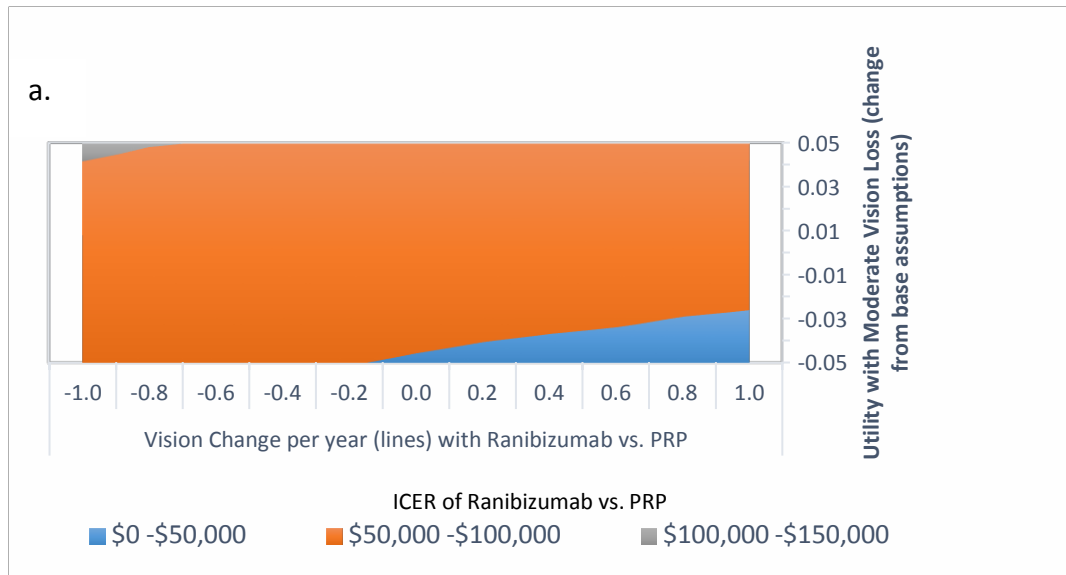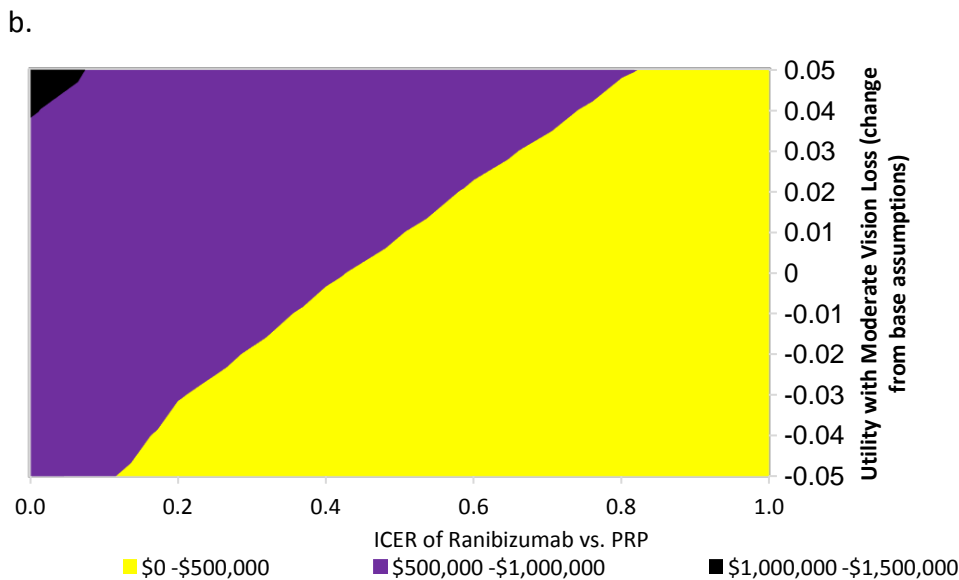

Figure 5b has an X-axis with a different scale than Figure 5a. It only includes improving long-term vision of ranibizumab vs. PRP. If ranibizumab patients have worsening vision compared to PRP, the ICER or ranibizumab vs. PRP can increase to tens of millions of dollars per QALY.

\*Utilities converted from visual acuity in better-seeing eye.

**eFigure 6. Two-Way Sensitivity Analysis on Cost of Anti-VEGF Drug Versus Effectiveness in Terms of Long-term Improvements in Vision With (a) and Without (b) Baseline Center-Involved Diabetic Macular Edema and Vision Loss\***

a.

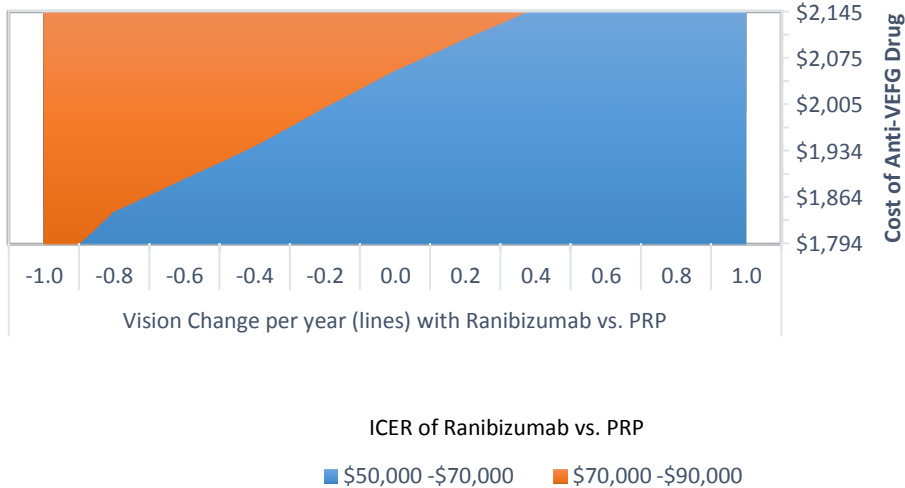

b.

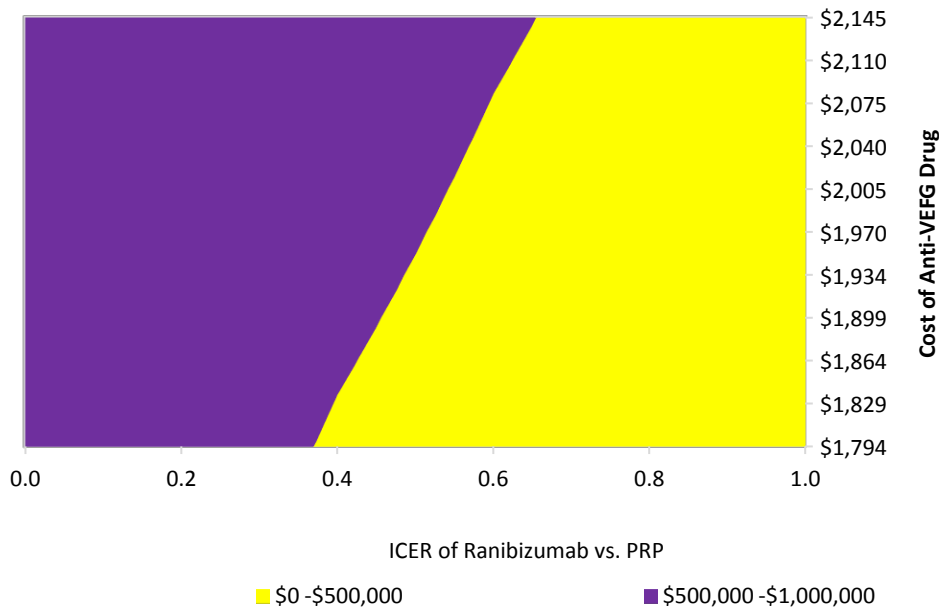

**eFigure 6a:** the Scale for the colors is more constrained than in Figures 4a and 5a. These variables make a smaller impact on the ICER. The colors range from \$50,000 to \$70,000 to \$90,000.

**eFigure 6b:** has a X-axis with a different scale than Figure 5a. It only includes improving long-term vision of ranibizumab vs. PRP. If ranibizumab patients have worsening vision compared to PRP, the ICER or ranibizumab vs. PRP can increase to many millions of dollars per QALY.

\*Utilities Converted from Visual Acuity in Better-Seeing Eye.

**eFigure 7: Cost-effectiveness Acceptability Curves With Utilities Converted From Visual Acuity in Treated Eye**

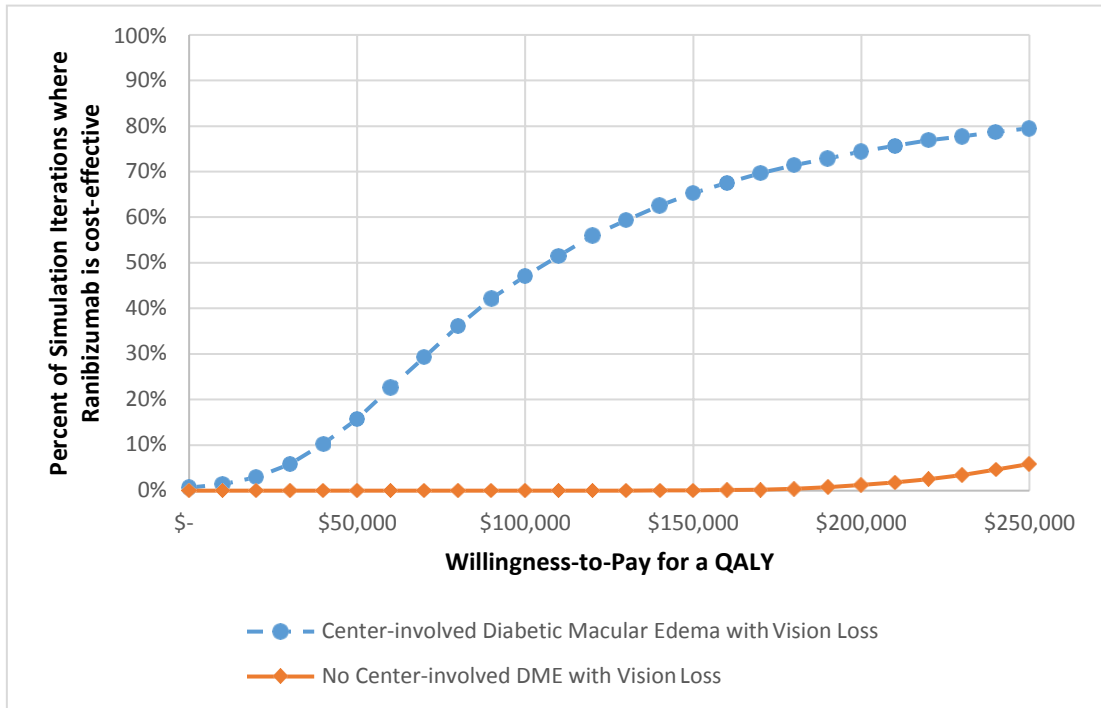

## eReferences

1. Centers for Medicare and Medicaid Services. Medicare fee for service payment: Physician fee schedule. 2018; <https://www.cms.gov/Medicare/Medicare-Fee-For-Service-Payment/PhysicianFeeSched/Index.html>. Accessed November 1, 2018.
2. Office of Inspector General. *Medicare payments for drugs used to treat wet age related macular degeneration*. Washington (DC): Department of Health and Human Services; April 20, 2012 2012.
3. Bonafede MM, Johnson BH, Richhariya A, Gandra SR. Medical costs associated with cardiovascular events among high-risk patients with hyperlipidemia. *ClinicoEconomics and outcomes research: CEOR*. 2015;7:337.
4. Brown MM, Brown GC, Sharma S, Landy J. Health care economic analyses and value-based medicine. *Survey of ophthalmology*. 2003;48(2):204-223.
